# Supplementary material for: Stretchable, sensitive, flexible strain sensor incorporated with patterned liquid metal on hydrogel for human motion monitoring and human–machine interaction
Source: Royal Society of Chemistry journal article supplement (doi:10.1039/d2tc01012g), 2022-01-01
Supplement: d2tc01012g3.pdf [file d2tc01012g3.pdf]

## Supporting Information

### **Stretchable, sensitive, flexible strain sensor incorporated with patterned liquid metal on hydrogel for human motion monitoring and human-machine interaction**

Huaping Wu <sup>a,b</sup>, Hangcheng Qi <sup>a,b</sup>, Xueer Wang <sup>c</sup>, Ye Qiu <sup>a,b</sup>, Kuanqiang Shi <sup>a,b</sup>, Hengjie Zhang <sup>a,b</sup>, Zheng Zhang <sup>a,b</sup>, Wenan Zhang <sup>c,\*</sup> and Ye Tian <sup>a,b,\*</sup>

<sup>a</sup> College of Mechanical Engineering, Zhejiang University of Technology, Hangzhou, 310023, China;

<sup>b</sup> Key Laboratory of Special Purpose Equipment and Advanced Processing Technology, Ministry of Education and Zhejiang Province, Zhejiang University of Technology, Hangzhou, 310023, China

<sup>c</sup> College of Information Engineering, Zhejiang University of Technology, Hangzhou, 310023, China

#### **Corresponding Author**

Wenan Zhang, Email: wazhang@zjut.edu.cn

Ye Tian, Email: tianye@zjut.edu.cn

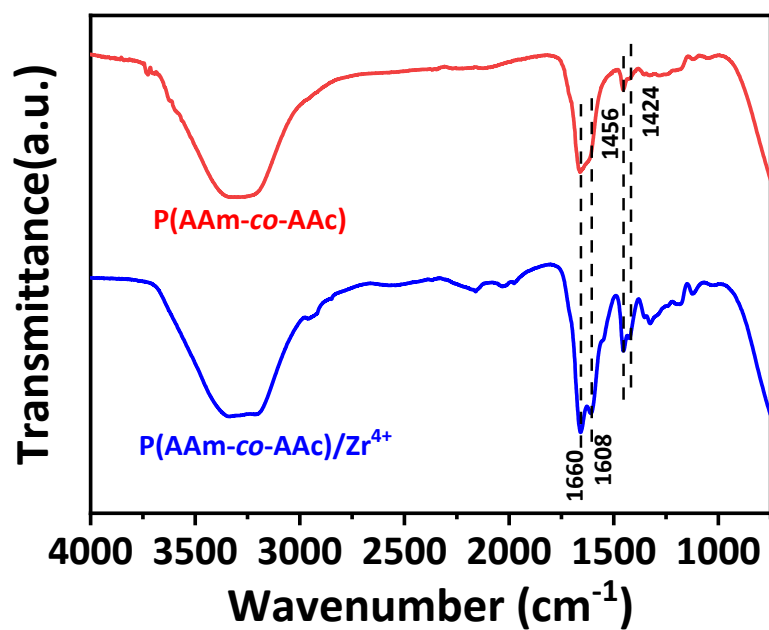

**Figure S1.** FTIR spectra of equilibrated P(AAm-co-AAc) ( $C_m = 5$  M,  $f_{AAc} = 30$  mol%) and P(AAm-co-AAc)/Zr<sup>4+</sup> ( $C_m = 5$  M,  $f_{AAc} = 30$  mol%,  $C_{Zr^{4+}} = 0.5$  M) hydrogel films.

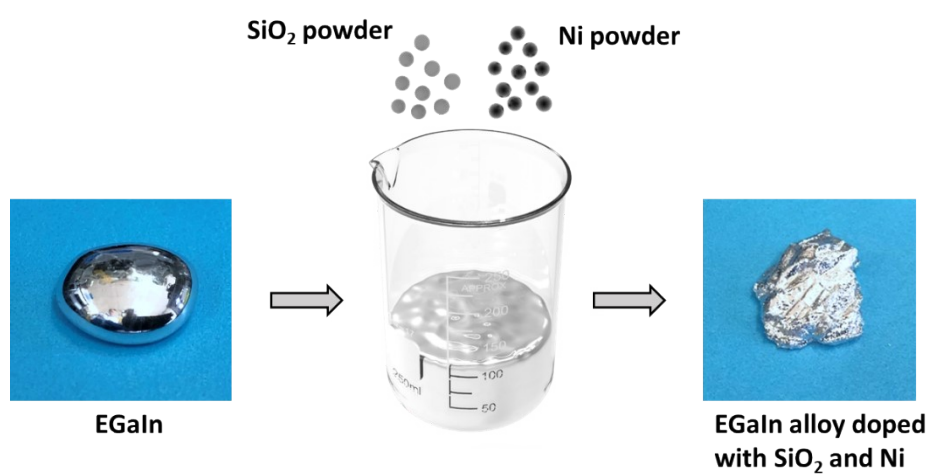

**Figure S2.** Schematic diagram of the preparation of EGaIn alloy doped with SiO<sub>2</sub> and Ni.

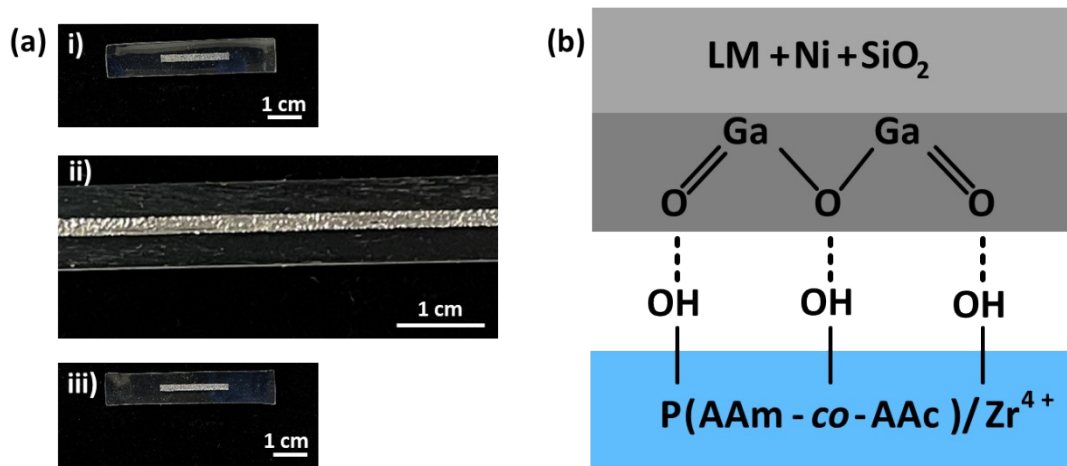

**Figure S3.** (a) Photographs of linear LM strip shadow printed on the hydrogel surface (i) before, (ii) after applying a tensile strain of 300% and (iii) after recovery from stretching for 300 times. (b) Schematic diagram of interfacial adhesion between the LM and hydrogel layers.

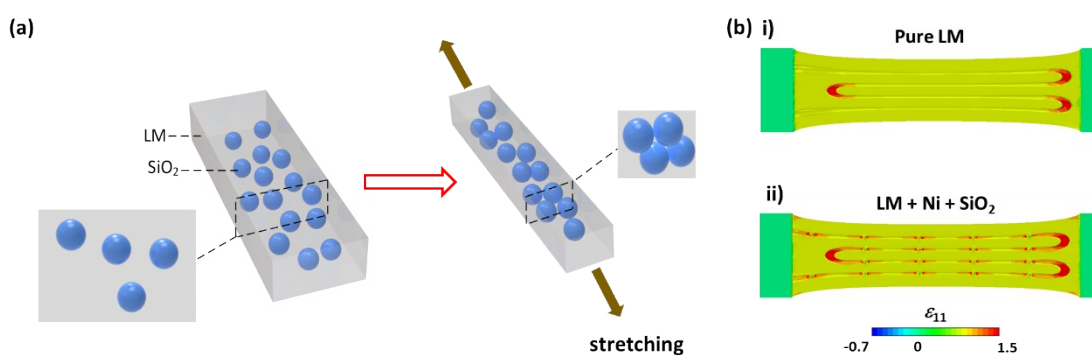

**Figure S4.** (a) Diagram of LM doped with SiO<sub>2</sub> particles before and after stretching. (b) Finite element analysis of tensile strain of the strain sensor patterned with (i) pure LM and (ii) LM doped with Ni and SiO<sub>2</sub> particles.

**Table S1.** Comparison of the maximum gauge factor and strain of flexible strain sensors.

| Materials                    | Strain (%) | Gauge factor | Reference <sup>a</sup> |
|------------------------------|------------|--------------|------------------------|
| LM/P(AAm- <i>co</i> -MAAc)   | 630        | 1.42         | S1                     |
| LM/Ecoflex                   | 396        | 2.20         | S2                     |
| LM/PVA                       | 375        | 0.73         | S3                     |
| oxCNTs/PAAm                  | 700        | 3.39         | S4                     |
| PANI/P(AAm- <i>co</i> -HEMA) | 300        | 1.48         | S5                     |
| AgNPs/PDMS                   | 70         | 10.80        | S6                     |
| CB/PDMS                      | 30         | 0.20         | S7                     |
| MWCNTs/PDMS                  | 40         | 7.22         | S8                     |
| CB/CNT/TPU                   | 50         | 4.10         | S9                     |
| PEDOT:SL/PAAc                | 100        | 7.00         | S10                    |

#### References<sup>a</sup>

- S1 X. P. Hao, C. Y. Li, C. W. Zhang, M. Du, Z. Ying, Q. Zheng and Z. L. Wu, *Adv. Funct. Mater.*, 2021, 2105481.
- S2 Y. Mengu“cx, Y.-L. Park, H. Pei, D. Vogt, P. M. Aubin, E. Winchell, L. Fluke, L. Stirling, R. J. Wood and C. J. Walsh, *Int. J. Rob. Res.*, 2014, 33, 1748–1764.
- S3 C. Xu, B. Ma, S. Yuan, C. Zhao and H. Liu, *Adv. Electron. Mater.*, 2020, 6, 1900721.
- S4 X. Sun, Z. Qin, L. Ye, H. Zhang, Q. Yu, X. Wu, J. Li and F. Yao, *Chem. Eng. J.*, 2020, 382, 122832.
- S5 Z. Wang, J. Chen, Y. Cong, H. Zhang, T. Xu, L. Nie and J. Fu, *Chem. Mater.*, 2018,

30, 8062–8069.

S6 H. M. Soe, A. A. Manaf, A. Matsuda and M. Jaafar, *J. Mater. Sci.: Mater. Electron.*, 2020, 31, 11897–11910.

S7 X. Cheng, C. Bao, X. Wang and W. Dong, *Proc. Inst. Mech. Eng., Part L: J. Mater.: Des. Appl.*, 2020, 234, 496–503.

S8 T. Li, J. Li, A. Zhong, F. Han, R. Sun, C.-P. Wong, F. Niu, G. Zhang and Y. Jin, *Sens. Actuators A*, 2020, 306, 111959.

S9 M. Go, X. Qi, P. Matteini, B. Hwang and S. Lim, *Sens. Actuators A*, 2021, 332, 113098.

S10 Q. Wang, X. Pan, C. Lin, D. Lin, Y. Ni, L. Chen, L. Huan, S. Cao and X. Ma, *Chem. Eng. J.*, 2019, 370, 1039–1047.

**Table S2.** Comparison of the detection limit and sensing range of flexible strain sensors.

| <b>Materials</b>    | <b>Sensing range (%)</b> | <b>Detection limit (%)</b> | <b>Reference<sup>b</sup></b> |
|---------------------|--------------------------|----------------------------|------------------------------|
| Ag/rGO/PDMS         | 200                      | 0.20                       | S11                          |
| MXene/PANIF/VHB     | 80                       | 0.15                       | S12                          |
| CS/MWCNT/PDMS       | 80                       | 0.40                       | S13                          |
| LM/Ecoflex          | 310                      | 0.09                       | S14                          |
| PANI/P(AAm-co-HEMA) | 300                      | 0.30                       | S15                          |
| CB/TPU/Ecoflex      | 225                      | 0.50                       | S16                          |
| Ag/MWCNT/G/PDMS     | 170                      | 0.10                       | S17                          |
| PAAm/Carrageenan    | 400                      | 0.50                       | S18                          |
| CNT/TPU             | 600                      | 0.05                       | S19                          |
| CNT/PDMS            | 100                      | 0.01                       | S20                          |

#### References<sup>b</sup>

S11 L. Zhang, H. Kou, Q. Tan, G. Liu, W. Zhang and J. Xiong, *J. Phys. D: Appl. Phys.*, 2019, 52, 395401.

S12 M. Chao, Y. Wang, D. M, X. W, W. Zhang, L. Zhang and P. Wan, *Nano Energy*, 2020, 78, 105187.

S13 B. Zhang, W. Wang, D. Zhang, T. Li, H. Zhang, C. Du, W. Zhao and Y. Yang, *J. Mater. Chem. C*, 2021, 9, 14848–14857.

S14 J. Chen, J. Zhang, Z. Luo, J. Zhang, L. Li, Y. Su, X. Gao, Y. Li, W. Tang, C. Cao,

- Q. Liu, L. Wang and H. Li, *ACS Appl. Mater. Interfaces*, 2020, 12, 22200–22211.
- S15 Z. Wang, J. Chen, Y. Cong, H. Zhang, T. Xu, L. Nie and J. Fu, *Chem. Mater.*, 2018, 30, 8062–8069.
- S16 Y. Zhao, M. Ren, Y. Shang, J. Li, S. Wang, W. Zhai, G. Zheng, K. Dai, C. Liu and C. Shen, *Compos. Sci. Technol.*, 2020, 200, 108448.
- S17 J. Lin, X. Cai, Z. Liu, N. Liu, M. Xie, B. Zhou, H. Wang and Z. Guo, *Adv. Funct. Mater.*, 2020, 30, 2000398.
- S18 J. Wu, Z. Wu, X. Lu, S. Han, B.-R. Yang, X. Gui, K. Tao, J. Miao and C. Liu, *ACS Appl. Mater. Interfaces*, 2019, 11, 9405–9414.
- S19 H. Li, J. Chen, X. Chang, Y. Xu, G. Zhao, Y. Zhu and Y. Li, *J. Mater. Chem. A*, 2021, 9, 1795–1802.
- S20 J. Chen, G. Zhu, F. Wang, Y. Xu, C. Wang, Y. Zhu and W. Jiang, *Compos. Sci. Technol.*, 2021, 213, 108932.

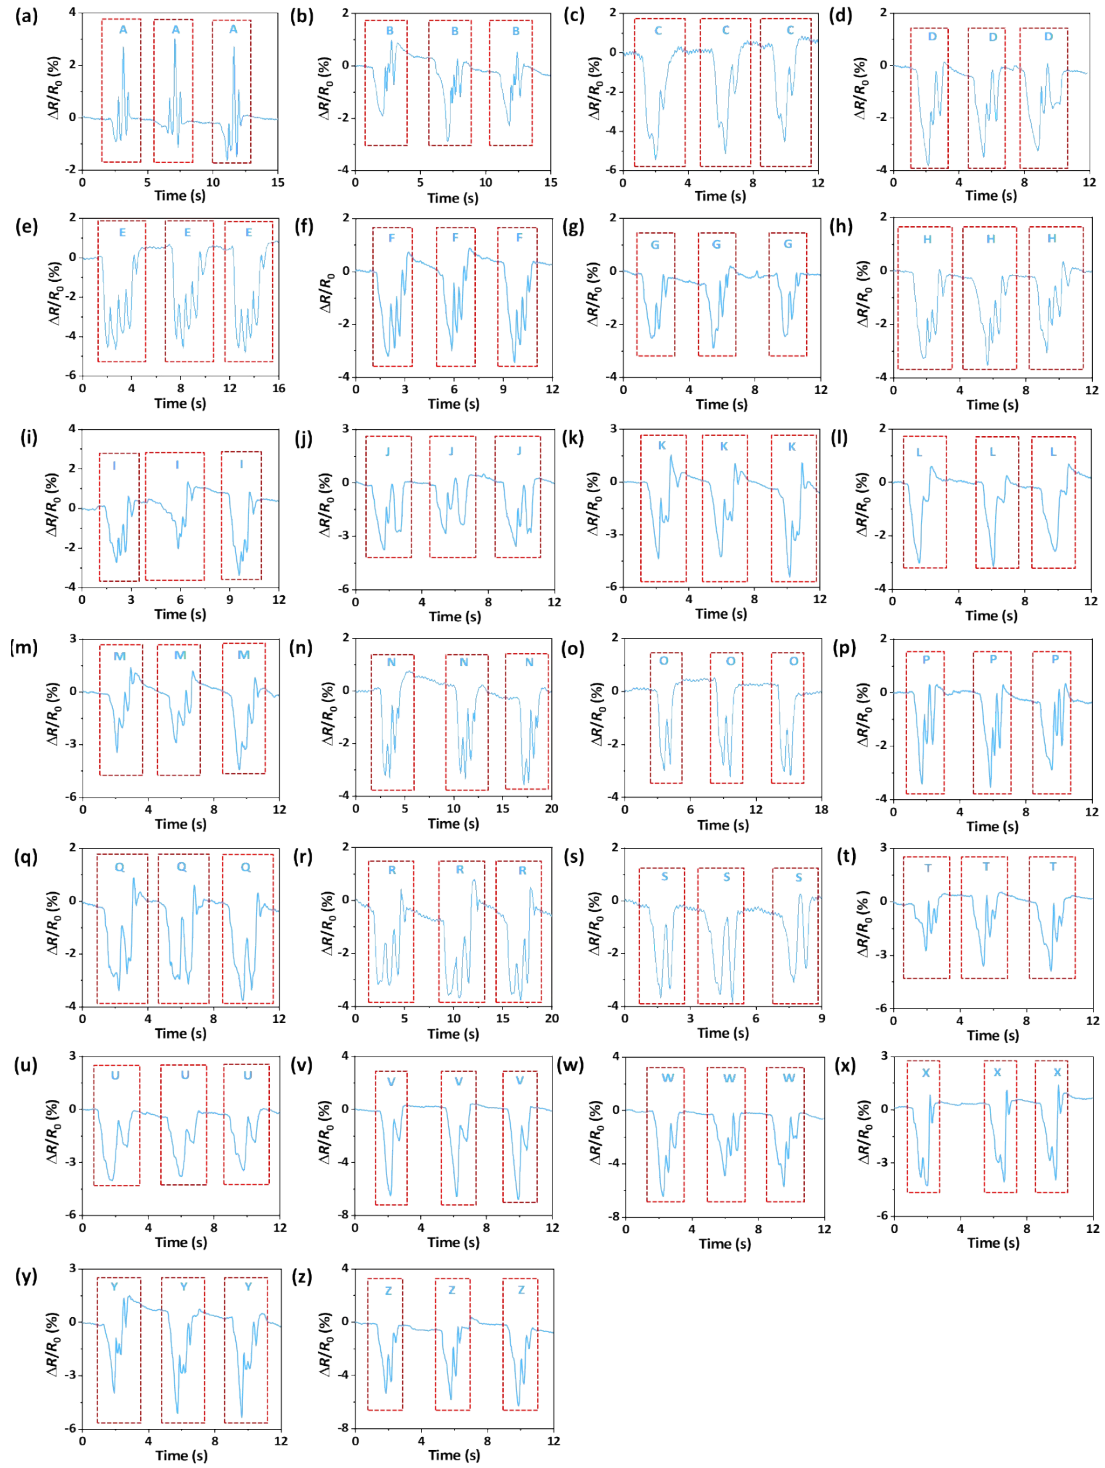

**Figure S5.** The relative resistance change curves for detection of handwriting different letters.



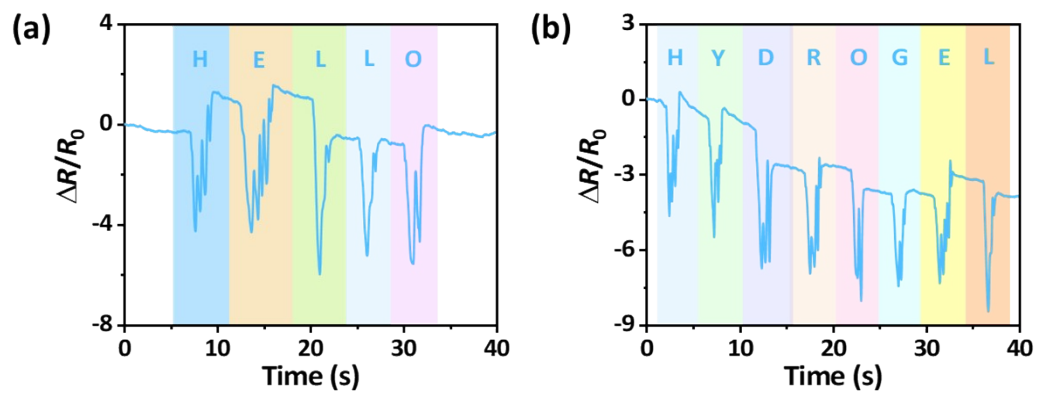

**Figure S6.** The relative resistance change curves for detection of handwriting different words, (a) "HELLO", and (b) "HYDROGEL".
